# Responses of lactic acid bacteria to oxygen \*

Seamus Condon

*Department of Food Microbiology, University College, Cork, Republic of Ireland*

Key words: Lactic acid bacteria; Oxygen

## 1. SUMMARY

A small number of flavoprotein oxidase enzymes are responsible for the direct interaction of lactic acid bacteria (LAB) with oxygen; hydrogen peroxide or water are produced in these reactions. In some cultures exposed to oxygen, hydrogen peroxide accumulates to inhibitory levels.

Through these oxidase enzymes and NADH peroxidase, O<sub>2</sub> and H<sub>2</sub>O<sub>2</sub> can accept electrons from sugar metabolism, and thus have a sparing effect on the use of metabolic intermediates, such as pyruvate or acetaldehyde, as electron acceptors. Consequently, sugar metabolism in aerated cultures of LAB can be substantially different from that in unaerated cultures. Energy and biomass yields, end-products of sugar metabolism and the range of substrates which can be metabolised are affected.

Lactic acid bacteria exhibit an inducible oxidative stress response when exposed to sublethal levels of H<sub>2</sub>O<sub>2</sub>. This response protects them if they are subsequently exposed to lethal concentrations of H<sub>2</sub>O<sub>2</sub>. The effect appears to be related to other stress responses such as heat-shock and is similar, in some but not all respects, to that previously reported for enteric bacteria.

\* Presented at the Second Symposium on Lactic Acid Bacteria — Genetics, Metabolism and Applications, 22–25 September 1987, Wageningen, The Netherlands.

Correspondence to: S. Condon, Department of Food Microbiology, University College, Cork, Republic of Ireland.

## 2. INTRODUCTION

In this paper the term Lactic Acid Bacteria (LAB) is interpreted in the traditional way i.e. the four genera *Streptococcus* (S.), *Leuconostoc* (Leuc.), *Pediococcus* (P.) and *Lactobacillus* (L.). The group includes some strict anaerobes but the majority of strains investigated are aerotolerant to some degree, and often completely so. With very few exceptions, LAB react to O<sub>2</sub> and the consequences of such reactions may be beneficial or detrimental. LAB generally grow satisfactorily in the absence of O<sub>2</sub>, and in its presence some are inhibited partially or completely. Consequently, it is quite usual to consider that the normal growth metabolism of LAB is anaerobic and that metabolism in the presence of O<sub>2</sub> is somewhat aberrant.

## 3. ENZYMATIC REACTIONS OF LACTIC ACID BACTERIA WITH OXYGEN

In general, LAB remove O<sub>2</sub> from solution, often at substantial rates when their environment contains a substrate which they can oxidise. The oxidation–reduction reactions involve a transfer of 1, 2 or 4 electrons to the dioxygen molecule as follows:

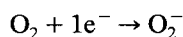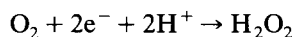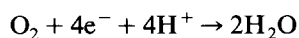

The superoxide anion ( $O_2^-$ ) is short-lived as it is dismuted, spontaneously or through superoxide dismutase (SOD) or high intracellular  $Mn^{2+}$ , to the more stable  $H_2O_2$ . No enzyme has been identified in LAB which produces  $O_2^-$  as an end-product but it is a possible intermediate compound in the formation of  $H_2O_2$  or  $H_2O$ . The enzymes of LAB catalysing reactions with  $O_2$  which have been identified, all produce  $H_2O_2$  or  $H_2O$  as end products (Table 1). They are principally pyridine nucleotide oxidases but also pyruvate oxidase and  $\alpha$ -glycerophosphate oxidase.

### 3.1. Reduced pyridine nucleotide oxidases

Possession on an NADH oxidase appears to be a universal property of LAB. Three types have been reported. The first two are non-haem flavoproteins, one of which catalyses the reduction of  $O_2$  to  $H_2O_2$ , the other the reduction of  $O_2$  to  $H_2O$ . In many reports of NADH oxidases in LAB, the assay system used was the oxidation of NADH and the product was not measured. The difficulty in distinguishing between  $H_2O$  and  $H_2O_2$  forming enzymes is further exacerbated by the presence of an NADH peroxidase in many extracts, as the activity of a  $H_2O_2$  forming NADH oxidase plus that of excess NADH peroxidase is similar to the activity of  $H_2O$  forming NADH oxidase.

The NADH: $H_2O_2$  oxidase (Table 1) was first reported in *S. faecalis* by Dolin [1,2] and its presence in many LAB has since been confirmed [3–8]. The enzyme is cytoplasmic, is rather unstable and has not been purified.

The NADH: $H_2O$  oxidase (Table 1) is cytoplasmic and is also widespread in LAB [7–17]. The enzyme has been purified from *L. plantarum* [9], *S. faecalis* [10,17] and *Leuc. mesenteroides* [15]. The enzyme from *S. faecalis* has a molecular mass of 51 kDa and probably consists of a single polypeptide chain with one FAD prosthetic group [17]. The *Leuc. mesenteroides* enzyme has a molecular mass of 104 kDa and probably exists as a dimer with one FAD group per subunit [15]. The enzyme from *L. plantarum* was estimated to have a molecular mass of approximately 170 kDa with two molecules of FAD per enzyme molecule [9]. Neither  $O_2^-$  nor  $H_2O_2$  were detected as intermediates in the oxidation of NADH by the *S. faecalis* oxidase, although Fukui [9] detected  $H_2O_2$  as an end-product of NADH oxidation by an enzyme preparation disrupted with 2 M urea.

The third NADH oxidase is quite rare in LAB; it was observed in some LAB grown aerobically in media containing haematin. The enzyme is associated with the membrane fraction and is thought to form part of a rudimentary electron transport chain which reduced  $O_2$  to water and promotes a weak proton extrusion [18]. This system is widespread among strains of *S. faecalis* [19], but has only been observed in a few strains of other LAB [20].

The NADH oxidases described above have a pronounced preference for NADH rather than NADPH. A non-haem protein with NADPH oxidase activity has been detected in *Peptostreptococcus anaerobius* a strict anaerobe; this enzyme catalyses the formation of  $O_2^-$  and  $H_2O_2$  from  $O_2$

Table 1

Reactions involving molecular oxygen or oxygen metabolites catalysed by enzymes of lactic acid bacteria

1.  $NADH + H^+ + O_2 \xrightarrow{NADH:H_2O_2 \text{ oxidase}} NAD^+ + H_2O_2$
2.  $2 NADH + 2H^+ + O_2 \xrightarrow{NADH:H_2O \text{ oxidase}} 2 NAD^+ + 2 H_2O$
3.  $pyruvate + phosphate + O_2 \xrightarrow[TPP, FAD]{pyruvate oxidase} acetylphosphate + CO_2 + H_2O_2$
4.  $\alpha\text{-glycerophosphate} + O_2 \xrightarrow{\text{oxidase } \alpha\text{-glycerophosphate}} dihydroxyacetone \text{ phosphate} + H_2O_2$
5.  $2 O_2^- + 2 H^+ \xrightarrow{\text{superoxide dismutase}} H_2O_2 + O_2$
6.  $NADH + H^+ + H_2O_2 \xrightarrow{NADH \text{ peroxidase}} 2H_2O$

TPP = thiamine pyrophosphate; FAD = flavin adenine dinucleotide.

[21]. It is presumed that  $O_2^-$  is an intermediate in  $H_2O_2$  formation.

### 3.2. Pyruvate oxidase

Pyruvate oxidase which catalyses a direct reaction of pyruvate with molecular  $O_2$  (Table 1) was first demonstrated in *L. delbrueckii* [22] and since then in a few other lactobacilli [3,5,14,23] in *S. mutans* [24] and in *P. halophilus* [25]. The enzyme is cytoplasmic and was purified by Hager et al. [22] who showed that it contained FAD. Pyruvate oxidase in cell-free extracts of *L. plantarum* did not produce  $O_2^-$  as an intermediate [26].

### 3.3. $\alpha$ -Glycerophosphate oxidase

The reaction catalysed by  $\alpha$ -glycerophosphate oxidase (Table 1) occurs in those LAB which utilise glycerol as an  $O_2$ -dependent growth substrate. They include enterococci [27–29], lactobacilli [3; M.G. Murphy and S. Condon, unpublished data] and *P. pentosaceus* [30]. The enzyme has been partially purified; it is cytoplasmic and contains FAD [28,29].

## 4. ACCUMULATION OF $H_2O_2$ AND OTHER POSSIBLE TOXIC $O_2$ METABOLITES

Hydrogen peroxide is a product of some flavoprotein oxidases of LAB with  $O_2$  and it may accumulate in aerobic cultures of many strains [reviewed in 31]. Work at this laboratory established that about half of 20 Group N streptococci [8] and several lactobacilli [32] were inhibited by  $H_2O_2$  accumulation during aerobic growth. Other reports clearly demonstrate that accumulation to auto-inhibitory levels during exposure to  $O_2$  is widespread, but not universal among LAB [4,7,27,33,34; J.B. Smart and T.D. Thomas, unpublished data). Accumulation of  $H_2O_2$  is due to greater overall activity of systems that produce  $H_2O_2$  than those which eliminate it. The  $H_2O_2$  forming oxidases are undoubtedly the principal mechanisms for the production of  $H_2O_2$  in the LAB. It has been suggested that dismutation of  $O_2^-$  may also be a physiologically important source

of  $H_2O_2$  [35]. Hyperbaric  $O_2$  or agents which increase  $O_2$  uptake such as plumbagin undoubtedly promote extensive  $O_2^-$  production which can be dismuted to  $H_2O_2$  by SOD (Table 1), or high internal manganese concentrations [36,37]. However, there is little convincing evidence as yet that  $H_2O_2$  accumulation in LAB, growing under ordinary aerobic conditions, occurs via  $O_2^-$  in any substantial way. These bacteria lack many of the cellular components which promote the generation of  $O_2^-$  radicals from  $O_2$  [38]. Only 17% of the  $O_2$  utilised during NADH oxidation by cell-free extracts of *S. faecalis* (in which SOD was inhibited by a specific antibody) could be attributed to  $O_2^-$  formation [35]. Another report indicated that only 6% of the  $O_2$  metabolised by whole cells of *S. mutans* (with low SOD activity) was converted to  $O_2^-$  [7]. It was expected that NADH oxidases might be a likely source of  $O_2^-$  formation [35], but  $O_2^-$  production was not detected during NADH oxidation by a purified NADH: $H_2O$  oxidase from *S. faecalis* [17]. In addition  $O_2^-$  production was not observed during  $O_2$  reduction by cell-free extracts of *L. plantarum* with NADH, NADPH or pyruvate [26]. Some other oxidase of LAB such as NADH: $H_2O_2$  oxidase may release  $O_2^-$  as an intermediate, but at present the only convincing evidence for such an enzyme is that from *Peptostreptococcus anaerobius* [21]. The widespread distribution of SOD (or non-enzymatic manganese dismutation system) among LAB [35–37,39] does not fit comfortably with these observations. It has been suggested that SOD may have other physiological functions besides dismutation of  $O_2^-$  [40], but it is also possible that even low levels of  $O_2^-$  are so reactive that an active dismutation system is an important safeguard in aerobic environments.

In this context also is the question of whether the inhibition of LAB which coincides with  $H_2O_2$  accumulation is caused directly by  $H_2O_2$  or indirectly by a metabolite of  $H_2O_2$ . Inhibition of LAB by aeration at normal atmospheric pressures is invariably prevented by catalase [reviewed in 31;6,7,41,42]. However, it has been suggested that  $H_2O_2$  can react with  $O_2^-$  to form hydroxyl radical ( $OH\cdot$ ) and that the latter is the direct inhibitor of  $O_2$ -sensitive cells [43]. Although the feasibility is

not universally accepted [40] formation of  $\text{OH}\cdot$  from  $\text{H}_2\text{O}_2$  and  $\text{O}_2^-$  under physiological conditions has been demonstrated [44]. As already mentioned, the rate of production of  $\text{O}_2^-$  by LAB is probably low under normal aeration conditions. If  $\text{OH}\cdot$  is the direct toxic  $\text{O}_2$  metabolite, it would have to be effective at concentrations much lower than those of  $\text{H}_2\text{O}_2$ , which accumulates in aeration-inhibited cultures of LAB. Some years ago work at our laboratory showed that  $\text{H}_2\text{O}_2$  added to sterilised milk, at the concentrations which inhibited Group N streptococci, clearly inhibited acid production by unaerated milk cultures of the same bacteria [45]. Addition of mannitol, a known scavenger of  $\text{OH}\cdot$  [43], failed to relieve aeration inhibition of an *S. lactis* strain whereas catalase did [46]. At least for Group N streptococci, therefore, direct inhibition by  $\text{H}_2\text{O}_2$  rather than  $\text{OH}\cdot$  remains the most likely explanation for  $\text{O}_2$  sensitivity.

The inhibitory effects of  $\text{H}_2\text{O}_2$  on LAB may be potentiated in natural environments, such as milk or saliva; concentrations which are not of themselves inhibitory, may become so, because of the presence of lactoperoxidase and thiocyanate. Hydrogen peroxide produced by oral [47], mastitic [41], or Group N [48] streptococci may oxidise thiocyanate to hypothiocyanite in a reaction catalysed by lactoperoxidase as follows:

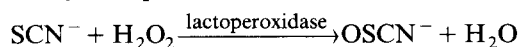

Further oxidation products formed in the presence of excess hydrogen peroxide ( $\text{O}_2\text{SCN}^-$  and  $\text{O}_3\text{SCN}^-$ ) may also be involved in the inhibition caused by the lactoperoxidase-thiocyanate- $\text{H}_2\text{O}_2$  system but most attention has been focussed on  $\text{OSCN}^-$  [reviewed in 49]. The mode of action of hypothiocyanite is complex and not fully understood. The overall effect on LAB is generally bacteriostatic whereas many Gram-negative bacteria are rapidly killed in its presence. A number of different physiological effects have been noted, principally leakage of  $\text{K}^+$  and amino acids, inhibition of uptake of carbohydrates, lactate and amino acids and the inhibition of specific glycolysis enzymes such as aldolase, hexokinase and glyceraldehyde-3-phosphate dehydrogenase. Streptococci resistant to hypothiocyanite have an

$\text{NADH} : \text{OSCN}^-$ -oxidoreductase which reduces  $\text{OSCN}^-$  to the inert  $\text{SCN}^-$  [49].

Accumulation of  $\text{H}_2\text{O}_2$  in aerobic cultures in LAB results from a greater capacity to form  $\text{H}_2\text{O}_2$  than to break it down. A flavoprotein NADH peroxidase (Table 1) first reported by Dolin [2,50] and which is widespread among LAB [3–5,12,14,47,51,52; J.B. Smart and T.D. Thomas, unpublished data] is probably mainly responsible for  $\text{H}_2\text{O}_2$  breakdown.

The enzyme purified from *S. faecalis* contained FAD [2]. It was not possible to separate the peroxidase from NADH oxidase in some LAB [5,12, J.B. Smart and T.D. Thomas, unpublished data]. In *L. plantarum* cultures NADH peroxidase was induced by  $\text{O}_2$  [14] and catabolite repressed by glucose [53,54]. Other enzymes which reduce  $\text{H}_2\text{O}_2$  have been found in a few strains of LAB. Both non-haem catalases termed pseudo-catalases and haem-catalases have been reported [reviewed in 31]. The latter enzymes require aerobic growth in the presence of haematin as only the apoenzyme is made by the LAB [55].

## 5. AERATION-INDUCED CHANGES IN SUGAR METABOLISM

When growing in the absence of  $\text{O}_2$ , LAB rely mainly on lactic dehydrogenase (LDH), acetaldehyde dehydrogenase and alcohol dehydrogenase, to regenerate  $\text{NAD}^+$  needed for the dehydrogenation reactions of sugar metabolism. In the presence of  $\text{O}_2$ , however, NADH oxidases and NADH peroxidases are alternative mechanisms of  $\text{NAD}^+$  regeneration. These mechanisms can have a sparing effect on pyruvate, acetyl-CoA and acetaldehyde and can alter the fermentation end-product spectrum.

### 5.1. Response of the heterolactic leuconostocs to aeration

The end-products of anaerobic glucose fermentation by leuconostocs are mainly lactate, ethanol and  $\text{CO}_2$ , but acetate is largely substituted for ethanol during aerobic growth (Fig. 1; [16, 54–58]). Strains which are missing NADH oxidase (occur-

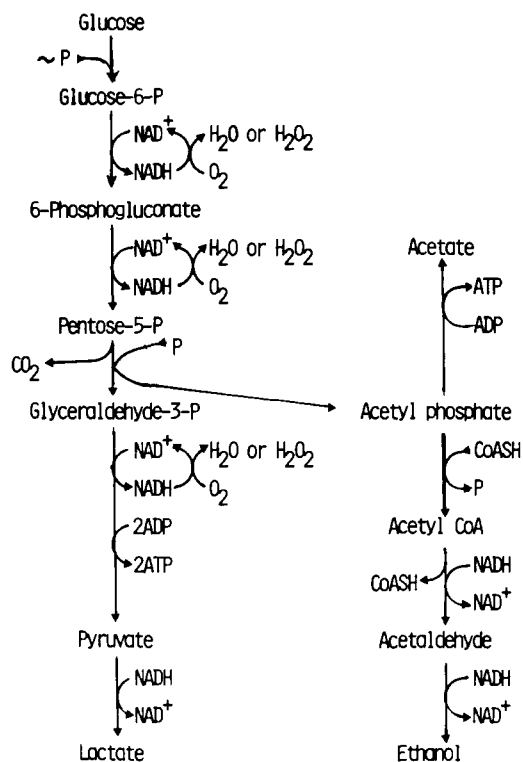

Fig. 1. Heterolactate pathway of glucose dissimilation.

ring naturally or constructed by mutation) form lactate, ethanol and  $\text{CO}_2$  in the presence or absence of  $\text{O}_2$  [16]. The ethanol branch of the heterolactic (phosphoketolase) pathway is needed to regenerate  $\text{NAD}^+$  for dehydrogenation of glucose-6-phosphate and 6-phosphogluconate. The regulation of synthesis of the enzymes concerned with the alternative routes of acetylphosphate metabolism is ideally organised to take advantage of the presence or absence of  $\text{O}_2$ . When  $\text{O}_2$  is available the specific activities of NADH oxidase and acetate kinase are high and those of phosphate acetyl transferase and alcohol dehydrogenase are low, thus facilitating acetate synthesis and high energy phosphate conservation. In the absence of  $\text{O}_2$  the leuconostocs respond with greater amounts of phosphate acetyl transferase and alcohol dehydrogenase and less NADH oxidase and acetate kinase activities [16].

The switch from ethanol to acetate synthesis doubles the amount of ATP that is formed from

glucose (Fig. 1). The molar growth yield of *Leuc. mesenteroides* (NADH oxidase-positive) growing aerobically on glucose is approximately double that obtained during anaerobic growth [16]. In addition, growth rates on glucose in the presence of  $\text{O}_2$  are much faster than in its absence [16,56], indicating that the rate of ATP formation from sugars is a growth-rate-limiting step in these bacteria. The RNA/DNA and RNA/protein ratios of *Leuc. mesenteroides* cells grown aerobically or anaerobically on glucose are similar, which indicates that the macromolecular composition of these bacteria does not change, even though the growth rate is faster in the presence of  $\text{O}_2$  [M. O'Keeffe and S. Condon, unpublished data].

Oxygen is not the only electron acceptor which stimulates leuconostocs growing on glucose. Growth of several strains are also stimulated by other exogenous substrates of dehydrogenase enzymes, such as pyruvate or acetaldehyde. Citrate also stimulates some strains, presumably, because it serves as a source of additional pyruvate [59].

## 5.2. $\text{O}_2$ -induced alterations in pyruvate transformation in lactic acid bacteria classified as homo-fermentative

The EMP pathway of sugar metabolism is used by streptococci, pediococci and some lactobacilli. In unaerated (not necessarily strictly anaerobic) cultures, with excess glucose as substrate, most of the pyruvate is converted to lactate to reoxidise NADH. Many of these bacteria have the genetic capacity to make products other than lactate from pyruvate, such as acetate,  $\text{CO}_2$ , formate, ethanol, acetoin, diacetyl and 2,3-butanediol [see Figs. 2–4] and their accumulation can be demonstrated by varying the conditions of sugar utilisation. For example, several lactic streptococci accumulate substantial amounts of formate, ethanol and acetate and correspondingly less lactate when grown in glucose- or lactose-limited unaerated chemostat cultures, whereas with excess sugar the same cultures are homolactic. The production of products other than lactate in the sugar-limited cultures is attributed to relatively low intracellular levels of fructose-1,6-bisphosphate (FBP), an essential activator of lactate dehydrogenase in

these strains [60]. The presence of  $O_2$  often has significant effects on the metabolism of pyruvate in these and other LAB.

### 5.2.1. Pyruvate to lactate transformation

Accumulation of products other than lactate from sugars by homofermentative LAB requires an alternative mechanism to lactate dehydrogenase (LDH) to oxidise NADH, or an alternative source of pyruvate which does not involve reduction of  $NAD^+$ . Most LAB have the capacity to oxidise NADH with  $O_2$  through the NADH oxidase/NADH peroxidase system(s), which are often induced by  $O_2$  [6,11,14,47,61; J.B. Smart and T.D. Thomas, unpublished data], or  $H_2O_2$  [14; M. Tangney and S. Condon, unpublished data]. These enzymes may also be repressed during growth in the presence of excess glucose [6,14,53]. The LDH has to compete with the NADH oxidase/NADH peroxidase enzymes for NADH in aerobically growing cells and in some strains the concentration of LDH may be reduced, though rarely by substantial amounts (J.B. Smart and T.D. Thomas, unpublished data). A more significant effect in determining the fate of pyruvate in some LAB under aerobic conditions, may be the intracellular levels of FBP. In experiments with *Staphylococcus epidermidis*, low intracellular levels of FBP correlated closely with acetate production in aerobically growing cells, or aerobic incubation of resting cells in glucose; in anaerobic conditions high FBP levels correlated with lactate formation [62]. However, other factors besides FBP levels are involved in determining whether pyruvate is converted to lactate or to other metabolites (see below).

### 5.2.2. The pyruvate formate-lyase pathway to formate, acetate and ethanol

This pathway (Fig. 2) appears to be a major alternative pathway to the LDH pathway in many homofermentative LAB growing under anaerobic conditions. The end-products are formate, ethanol and acetate. The operation of this pathway varies among LAB. Thomas et al. [60] found that most Group N streptococci produced formate, acetate and ethanol from glucose or lactose in unaerated chemostat cultures only when the sugar was limit-

ing and FBP levels were low. However, some oral streptococci accumulate these end-products even when glucose is in excess in strictly anaerobic conditions. Washed cell suspensions of anaerobic glucose cultures of *S. mutans* accumulated substantial amounts of formate, acetate and ethanol, as well as lactate, under strictly anaerobic conditions from excess glucose or galactose. The fermentation became much more homolactic in the presence of  $O_2$ , but the FBP levels were similar in the presence or absence of  $O_2$  [63,64]. In chemostat cultures with limiting glucose, *S. mutans* and *S. sanguis* accumulated very little lactate. In the absence of  $O_2$ , formate, acetate and ethanol were produced in a 2:1:1 ratio. A gradual increase in the aeration level led to a gradual increase in acetate and a decrease in formate and ethanol [65]. The main reason for these effects is the extreme sensitivity of pyruvate formate-lyase to  $O_2$  [63,64,66–68]. Cells of *S. mutans* exposed to  $O_2$  for 2 min lost 94% of their activity [63]. The levels of pyruvate formate-lyase and its inhibitor glyceraldehyde-3-phosphate are thought to play key roles in regulating pyruvate metabolism in oral streptococci under anaerobic conditions [63,64,69].

### 5.2.3. The pyruvate dehydrogenase pathway to acetate, ethanol and $CO_2$

This pathway (Fig. 2) differs from the pyruvate formate-lyase pathway only in the first step, the pyruvate dehydrogenase step, in which pyruvate is decarboxylated to form acetyl CoA with the reduction of  $NAD^+$ . This enzyme has been demonstrated in several Group N streptococci [70,71; J.B. Smart and T.D. Thomas, unpublished data]. It probably co-exists with pyruvate formate-lyase in many LAB. Pyruvate dehydrogenase is not sensitive to  $O_2$  and it is present at greater concentrations in aerobic than in anaerobic cultures (J.B. Smart and Thomas, T.D. unpublished data). In the absence of  $O_2$ , LDH and pyruvate formate-lyase have a distinct advantage over pyruvate dehydrogenase in competition for pyruvate as the latter enzyme involves reduction of  $NAD^+$ . However, in the presence of  $O_2$ , NADH can be reoxidised with the NADH oxidase/peroxidase system(s), which makes catalysis of pyruvate to

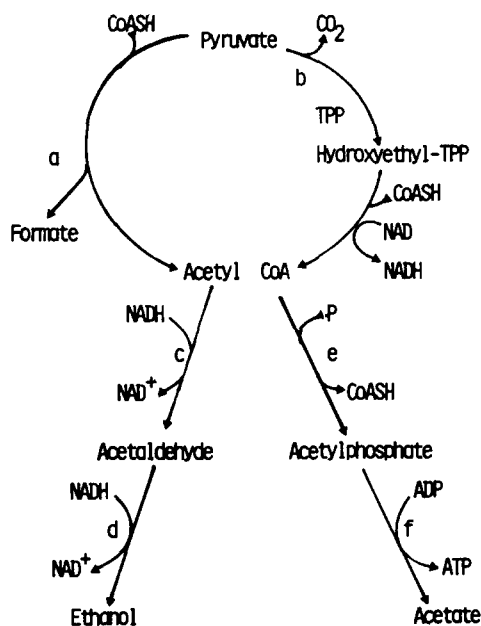

Fig. 2. Pyruvate formate-lyase and pyruvate dehydrogenase pathways a, pyruvate formate-lyase; b, pyruvate dehydrogenase; c, acetaldehyde dehydrogenase; d, alcohol dehydrogenase; e, phosphateacetyl transferase, f, acetate kinase.

acetyl CoA and  $\text{CO}_2$  more favourable, especially since pyruvate formate-lyase is  $\text{O}_2$ -sensitive.

The acetyl CoA formed in aerobically metabolising cells is more likely to be converted to acetate via acetyl phosphate than to ethanol via acetaldehyde. The ethanol branch dehydrogenase enzymes require NADH and are in competition with NADH oxidase/peroxidase, whereas acetyl CoA converted to acetate results in ATP synthesis. Some Group N streptococci which have the pyruvate formate-lyase [67] and the pyruvate dehydrogenase [70,71] pathways, and other homolactic LAB which have not yet been checked for these activities, accumulate lactate, formate, acetate and ethanol when metabolising sugars anaerobically, and lactate, acetate and  $\text{CO}_2$  when  $\text{O}_2$  is available [41,72–76; J.B. Smart and T.D. Thomas, unpublished data].

#### 5.2.4. The pyruvate oxidase pathway to acetate and $\text{CO}_2$

This pathway (Fig. 3) observed in a few species of lactobacilli [3,5,14,22,23], *S. mutans* [24] and *P.*

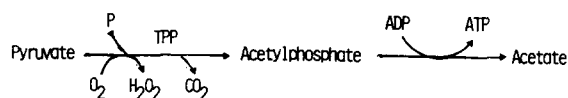

Fig. 3. Pyruvate oxidase pathway.

*halophilus* [25] is an alternative mechanism to pyruvate dehydrogenase/phosphate acetyl transferase for the formation of acetyl phosphate in aerobically growing cells. Pyruvate oxidase has not been observed in Group N streptococci [8; J.B. Smart and T.D. Thomas, unpublished data]. In *L. plantarum*, this activity is induced by aeration and catabolite repressed by glucose [14,53].

#### 5.2.5. Transformation of pyruvate to acetoin, 2,3-butanediol and diacetyl

These C4 end-products of sugar metabolism (Fig. 4) are found in cultures of some LAB and their synthesis is affected by  $\text{O}_2$  availability. The ability to make some C4 compounds, demonstrated by incubating cell suspensions, or cell-free extracts, with pyruvate is fairly widespread among LAB [20,70,71,77–79]. However, accumulation to any substantial extent in growing cultures of LAB requires special circumstances.

In general, when C4 compounds accumulate in growing cultures pyruvate, or an alternative source of pyruvate such as citrate, is available in addition to the fermentable sugar [54,78,80–83]. Neverthe-

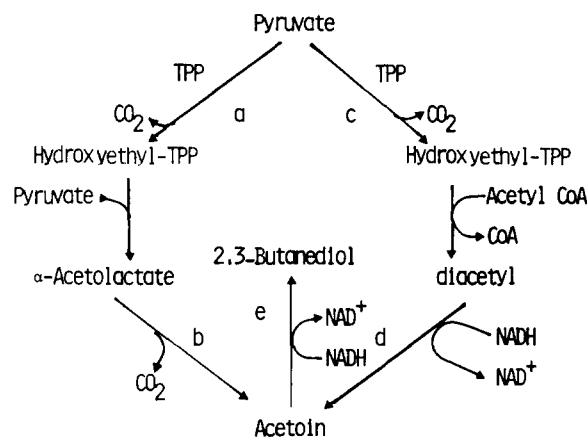

Fig. 4. Acetoin, diacetyl and 2,3-butanediol pathways. a,  $\alpha$ -acetolactate synthase; b,  $\alpha$ -acetolactate decarboxylase; c, diacetyl synthase; d, diacetyl reductase; e, 2,3-butanediol dehydrogenase.

less, C4 compounds have been observed occasionally in cultures of some streptococci growing in a sugar-based medium without additional pyruvate [41,73,79,84,85]. Since two molecules of pyruvate are needed in such cultures to make one C4 compound, oxidation of two NADH molecules is a prerequisite for synthesis.

Accumulation is, therefore, more likely in the presence rather than the absence of  $O_2$ . A survey of Group N streptococci [79] revealed that the related strains *S. lactis* C2, AC2 and 712 produced significant quantities of acetoin in aerobic culture, but not in the absence of  $O_2$ . Accumulation was greatest in a chemically defined medium, with galactose rather than glucose or lactose as the sugar and with catalase to eliminate  $H_2O_2$ . The level of  $\alpha$ -acetolactate synthase was 2–4-fold higher in aerobically than in anaerobically grown cells.  $H_2O_2$  added intermittently at sublethal levels to anaerobic cultures stimulated acetoin production. Diacetyl or 2,3-butanediol did not accumulate in growing cultures, but the latter was produced from pyruvate by resting cell suspensions, grown without but not with aeration.

## 6. ADVANTAGES OF AEROBIC METABOLISM

The metabolism of sugars to acetate rather than lactate doubles the amount of ATP formed through substrate level phosphorylation. Those LAB having an  $O_2$ -insensitive mechanism of acetate synthesis, should be able to benefit from the availability of the extra ATP during growth in the presence of  $O_2$ , by greater biomass yields and possibly faster growth rates. Such increases have been mentioned above when dealing with the heterolactic leuconostocs. It is not surprising that some homolactic bacteria also benefit from the presence of  $O_2$ ; yields of biomass during aeration are often greater than in the absence of  $O_2$ . The effects are particularly noticeable at low concentrations of sugar [41,52,86–88]. Growth rates of some homolactic LAB are faster in the presence of  $O_2$  than in its absence, especially if catalase is present to eliminate any  $H_2O_2$  formed [8,32].

Aerobic growth also allows some LAB to

metabolise substrates such as glycerol, mannitol, sorbitol and lactate that they do not utilise in the absence of  $O_2$  [reviewed in 31]. In our laboratory, the  $O_2$ -dependent utilisation of lactate by *L. plantarum* has been of particular interest [53,89]. The probable pathway is via dehydrogenation of lactate to pyruvate followed by oxidation to acetyl phosphate with pyruvate oxidase and finally conversion of acetyl phosphate to acetate with synthesis of ATP. The dehydrogenation step may involve both NAD-dependent and NAD-independent LDHs; the latter but not the former was induced by aeration as was also pyruvate oxidase, NADH peroxidase and NADH oxidase. The oxidases, peroxidase and acetate kinase were all repressed by glucose [53].

When *L. plantarum* is growing aerobically in a glucose broth, D- and L-lactates are the only major end-products during active growth, i.e. when the cells have low levels of lactate oxidising enzymes. When the glucose level decreases the lactate oxidation pathway is derepressed and now acetate rather than lactate accumulates. Finally, on prolonged incubation when the glucose is exhausted, the lactate is converted to acetate and thus allows *L. plantarum* to continue growing, albeit slowly, when  $O_2$  is available, but not in its absence [14,53,54].

## 7. OXIDATION STRESS RESPONSE

Some recent work indicates that LAB are similar to other organisms that have been investigated, in that they respond to sublethal concentrations of  $H_2O_2$  by inducing a protective system which helps them survive normally lethal levels of  $H_2O_2$ . In enteric bacteria the protective system consists of a set of 'stress proteins' which somehow protect the cells against  $H_2O_2$  damage but also against damage in other stressful environments e.g. high temperatures (heat shock response) and a variety of chemical oxidants [90,91]. Two Group N streptococci exposed to a sublethal (0.5 mM) level of  $H_2O_2$  survived a challenge with a lethal concentration (5 mM) at substantially greater rates than cultures which were not first exposed to the sublethal concentration. The  $H_2O_2$ -activated cells were also much more resistant to lethal temperatures (e.g.



55°C). Unlike the enteric bacteria, the protective system was also induced when anaerobically growing cells were exposed to O<sub>2</sub>. One of the cultures tested, *S. lactis* US3, does not accumulate H<sub>2</sub>O<sub>2</sub> when growing aerobically. Consequently, induction of the protective system by O<sub>2</sub> is unlikely to be caused by prior formation of H<sub>2</sub>O<sub>2</sub>. NADH peroxidase and (to a lesser extent) NADH oxidase were induced during the period of O<sub>2</sub> activation and also when the streptococci were exposed to a sublethal temperature (heat shock), suggesting that these enzymes may have roles in stressful situations (M. Tangney and S. Condon, unpublished data).

## 8. CONCLUSIONS

The generalisation that growth of lactic acid bacteria in the presence of O<sub>2</sub> is aberrant cannot be justified. Aerobic environments may be toxic for some strains, but for many O<sub>2</sub> (and or H<sub>2</sub>O<sub>2</sub> formed from O<sub>2</sub>) is an important electron acceptor which permits reoxidation of reduced pyrimidine nucleotides, over and above that which occurs in anaerobic sugar metabolism. This additional capacity for oxidation of NADH allows a wider range of substrates to be used for ATP generation and also the utilisation of pathways which are dormant in anaerobic cultures. Some of these pathways permit additional ATP generation and consequently improved molar growth yields and rates with conventional sugars such as glucose.

## REFERENCES

- [1] Dolin, M.I. (1953) The oxidation and peroxidation of DPNH<sub>2</sub> in extracts of *Streptococcus faecalis*, 10 C1. Arch. Biochem. Biophys. 46, 483–485.
- [2] Dolin, M.I. (1955) The DPNH-oxidising enzymes of *Streptococcus faecalis*, II. The enzymes utilising oxygen, cytochrome c, peroxide and 2,6-dichlorophenolindophenol or ferricyanide as oxidants. Arch. Biochem. Biophys. 55, 415–435.
- [3] Strittmatter, C.F. (1959) Flavin-linked oxidative enzymes of *Lactobacillus casei*. J. Biol. Chem. 234, 2794–2800.
- [4] Anders, R.F., Hogg, D.M. and Jago, G.R. (1970) Formation of hydrogen peroxide by Group N streptococci and its effect on their growth and metabolism. Appl. Microbiol. 19, 602–612.
- [5] Gotz, F., Sedewitz, B. and Elstner, E.F. (1980) Oxygen utilisation by *Lactobacillus plantarum*, I. Oxygen consuming reactions. Arch. Microbiol. 125, 209–214.
- [6] Grufferty, R.C. and Condon, S. (1983) Effect of fermentation sugar on hydrogen peroxide accumulation by *Streptococcus lactis* C10. J. Dairy Res. 50, 481–489.
- [7] Thomas, E.L. and Pera, K.A. (1983) Oxygen metabolism of *Streptococcus mutans*: Uptake of oxygen and release of superoxide and hydrogen peroxide. J. Bacteriol. 154, 1236–1244.
- [8] Fitzgerald, F.M. (1983) Aerobic Metabolism of Group N Streptococci and *Leuconostoc mesenteroides*. MSc. Thesis, University College, Cork, Ireland.
- [9] Fukui, S. (1961) Crystalline DPNH oxidase from *Lactobacillus plantarum* No. 11. Agr. Biol. Chem. 25, 876–878.
- [10] Hoskins, D.D., Whitely, H.R. and Mackler, B. (1962) The reduced diphosphopyridinenucleotide oxidase of *Streptococcus faecalis*: Purification and properties. J. Biol. Chem. 237, 2647–2651.
- [11] Bruhn, J.C. and Collins, E.B. (1970) Reduced nicotinamide adenine dinucleotide oxidase of *Streptococcus diacetilactis* J. Dairy Sci. 53, 857–860.
- [12] Walker, G.A. and Kilgour, G.L. (1965) Pyridine nucleotide oxidising enzymes of *Lactobacillus casei*, II. Oxidase and peroxidase. Arch. Biochem. Biophys. 111, 534–539.
- [13] Kawai, K., Yashima, S., Okami, Y. and Sasaki, Y. (1971) Aerobic dissimilation of glucose by heterolactic bacteria, I. Reduced pyridine nucleotide oxidising enzymes in *Leuconostoc mesenteroides*. J. Gen. Appl. Microbiol. 17, 51–62.
- [14] Murphy, M.G. and Condon, S. (1984) Correlation of oxygen utilisation and hydrogen peroxide accumulation with oxygen induced enzymes in *Lactobacillus plantarum* cultures. Arch. Microbiol. 138, 44–48.
- [15] Koike, K., Kobayashi, T., Ito, S. and Saitoh, M. (1985) Purification and characterisation of NADH oxidase from a strain of *Leuconostoc mesenteroides*. J. Biochem. 97, 1297–1288.
- [16] Lucey, C.A. and Condon, S. (1986) Active role of oxygen and NADH oxidase in growth and energy metabolism of *Leuconostoc*. J. Gen. Microbiol. 132, 1789–1796.
- [17] Schmidt, H.L., Stöcklein, W., Danzer, J., Kirch, P. and Limbach, B. (1986) Isolation and properties of an H<sub>2</sub>O-forming NADH oxidase from *Streptococcus faecalis*. Eur. J. Biochem. 156, 149–155.
- [18] Pritchard, G.G. and Wimpenny, J.W.T. (1978) Cytochrome formation, oxygen-induced proton extrusion and respiratory activity in *Streptococcus faecalis* var. *zymogenes* grown in the presence of haematin. J. Gen. Microbiol. 104, 15–22.
- [19] Richey, T.W. and Seeley, Jr., H.W. (1976) Distribution of cytochrome-like respiration in streptococci. J. Gen. Microbiol. 93, 195–203.
- [20] Sijpestijn, A.K. (1970) Induction of cytochrome formation

- and stimulation of oxidative dissimilation by hemin in *Streptococcus lactis* and *Leuconostoc mesenteroides*. *Antonie van Leeuwenhoek* 36, 335–348.
- [21] Hoshino, E., Frölander, F. and Carlsson, J. (1978) Oxygen and the metabolism of *Peptostreptococcus anaerobius* VP1 4330-1. *J. Gen. Microbiol.* 107, 235–248.
  - [22] Hager, L.P., Geller, D.M. and Lipmann, F. (1954) Flavoprotein-catalysed pyruvate oxidation in *Lactobacillus delbrueckii*. *Fed. Proc.* 13, 734–738.
  - [23] Lloyd, G.T., Hillier, A.J., Barlow, I. and Jago, G.R. (1978) Aerobic formation of acetate from pyruvate by *Lactobacillus bulgaricus*. *Aust. J. Biol. Sci.* 31, 565–571.
  - [24] Carlsson J. and Kjøval, N. (1985) Pyruvate oxidase activity dependent on thiamine pyrophosphate, flavin adenine dinucleotide and orthophosphate in *Streptococcus sanguis*. *FEMS Microbiol. Lett.* 25, 53–56.
  - [25] Kanbe, C. and Uchida, K. (1985) Oxygen consumption by *Pediococcus halophilus*. *Agric. Biol. Chem.* 49, 2931–2937.
  - [26] Gotz, F., Elstner, E.F., Sedewitz, B. and Longfelder, E. (1980) Oxygen utilisation by *Lactobacillus plantarum*, II. Superoxide and superoxide dismutation. *Arch. Microbiol.* 125, 215–220.
  - [27] Gunsalus, I.C. and Umbreit, N.W. (1945) The oxidation of glycerol by *Streptococcus faecalis*. *J. Bacteriol.* 49, 347–357.
  - [28] Jacobs, N.J. and Van Demark, P.J. (1960) Comparison of the mechanism of glycerol oxidation in aerobically and anaerobically grown *Streptococcus faecalis*. *J. Bacteriol.* 79, 533–538.
  - [29] Koditchek, L.K. and Umbreit, N.W. (1969)  $\alpha$ -Glycerophosphate oxidase in *Streptococcus faecium* F24. *J. Bacteriol.* 98, 1063–1068.
  - [30] Dubrogosz, N.J. and Stone, R.W. (1962) Oxidative metabolism in *Pediococcus pentosaceus*, I. Role of oxygen and catalase. *J. Bacteriol.* 84, 716–723.
  - [31] Condon, S. (1983) Aerobic metabolism of lactic acid bacteria. *Irish J. Fd. Sci. Technol.* 7, 15–25.
  - [32] Buggy, M.M. (1985) Comparison of the Responses of a Range of Lactobacillus Strains to Aeration. M.Sc. Thesis, University College, Cork, Ireland.
  - [33] Gilliland, S.E. and Speck, M.L. (1969) Biological responses of lactic streptococci and lactobacilli to catalase. *Appl. Microbiol.* 17, 797–800.
  - [34] Lee, I.H., Frederickson, A.G. and Tsuchiga, H.M. (1976) Damped oscillations in continuous culture of *Lactobacillus plantarum*. *J. Gen. Microbiol.* 93, 204–208.
  - [35] Britton, L., Malinowski, D.P. and Fridovich, I. (1978) Superoxide dismutase and oxygen metabolism in *Streptococcus faecalis* and comparisons with other organisms. *J. Bacteriol.* 134, 229–236.
  - [36] Archibald, F.S. and Fridovich, I. (1981) Manganese and defenses against oxygen toxicity in *Lactobacillus plantarum*. *J. Bacteriol.* 145, 442–451.
  - [37] Archibald, F.S. and Fridovich, I. (1981) Manganese, superoxide dismutase and oxygen tolerance in some lactic acid bacteria. *J. Bacteriol.* 146, 928–936.
  - [38] Fridovich, I. (1983) Superoxide radical: An endogenous toxicant. *Annu. Rev. Pharmacol. Toxicol.* 23, 239–257.
  - [39] Zitzelsberger, W., Gotz, F. and Schleifer, K.H. (1984) Distribution of superoxide dismutases, oxidases and NADH peroxidase in various streptococci. *FEMS Microbiol. Lett.* 21, 243–246.
  - [40] Fee, J.A. (1980) A comment on the hypothesis that oxygen toxicity is mediated by superoxide. In: *Oxygen and Life* (Second Priestly Conference), pp. 77–79. Royal Society of Chemistry Publications, London.
  - [41] Mickelson, M.N. and Brown, R.W. (1985) Physiological characteristics of *Streptococcus dysgalactiae* and *Streptococcus uberis* and the effect of the lactoperoxidase complex on their growth in a chemically defined medium and milk. *J. Dairy Sci.* 68, 1095–1102.
  - [42] Mattila, T. (1985) Role of oxygen radicals in the bacteriostatic effect of whey and production of bacterial growth by free radical scavengers. *J. Dairy Res.* 52, 149–157.
  - [43] Gregory, E.M. and Fridovich, I. (1974) Oxygen metabolism in *Lactobacillus plantarum*. *J. Bacteriol.* 117, 166–169.
  - [44] Rowley, D.A. and Halliwell, B. (1982) Superoxide-dependent formation of hydroxyl radicals in the presence of thiol compounds. *FEBS Lett.* 138, 33–36.
  - [45] Keane, M.I. (1973) Accumulation of Hydrogen Peroxide by Lactic Streptococci and Sensitivity of Strains to Levels produced. M.Sc. Thesis, University College, Cork, Ireland.
  - [46] Grufferty, R.C. (1981) Oxygen sensitivity and *Streptococcus lactis* C10. M.Sc. Thesis, University College, Cork, Ireland.
  - [47] Carlsson, J., Iwami, Y. and Yamada, Y. (1983) Hydrogen peroxide excretion by oral streptococci and effect of lactoperoxidase-thiocyanate-hydrogen peroxide. *Infect. Immun.* 40, 70–80.
  - [48] Oram, J.D. and Reiter, B. (1966) The inhibition of streptococci by lactoperoxidase, thiocyanate and hydrogen peroxide. The effect of the inhibitory system on susceptible and resistant strains of Group N streptococci. *Biochem. J.* 100, 373–381.
  - [49] Reiter, B. (1985) The biological significance of the non-immunoglobulin protective proteins in milk: lysozyme, lactoferrin, lactoperoxidase. In: *Developments in Dairy Chemistry*, Vol. 3 (Fox, P.F., Ed.), pp. 281–336. Elsevier Applied Science Publishers, London.
  - [50] Dolin, M.I. (1957) The *Streptococcus faecalis* oxidases for reduced diphosphopyridine nucleotide, III. Isolation of a flavin peroxidase for reduced diphosphopyridine nucleotide. *J. Biol. Chem.* 225, 557–573.
  - [51] Brown, J.P. and Van Demark, P.J. (1968) Respiration of *Lactobacillus casei*. *Can. J. Microbiol.* 14, 829–853.
  - [52] Yousten, A.A., Johnson, J.L. and Salin, M. (1975) Oxygen metabolism of catalase-negative and catalase-positive strains of *Lactobacillus plantarum*. *J. Bacteriol.* 123, 242–247.
  - [53] Brosnan, C.A. (1984) Regulation of Oxygen-dependent Lactate Metabolism by *Lactobacillus plantarum*. M.Sc. Thesis, University College, Cork, Ireland.
  - [54] Murphy, M.G. and Condon, S. (1984) Comparison of aerobic and anaerobic growth of *Lactobacillus plantarum* in a glucose medium. *Arch. Microbiol.* 138, 49–53.
  - [55] Pugh, S.Y.R. and Knowleds, C.J. (1983) Synthesis of

- catalase by *Streptococcus faecalis* subsp. *zymogenes*. Arch. Microbiol. 136, 60–63.
- [56] Johnson, M.K. and McCleskey, C.S. (1957) Studies on the aerobic carbohydrate metabolism of *Leuconostoc mesenteroides*. J. Bacteriol. 74, 22–25.
- [57] Keenan, T.W. (1968) Production of acetic acid and other volatile compounds by *Leuconostoc citrovorum* and *Leuconostoc dextranum*. Appl. Microbiol. 16, 1881–1885.
- [58] Ito, S., Hashiba, H. and Eguchi, Y. (1974) Adaptive control of the ethanol forming system in heterolactic acid bacteria. J. Biochem. 75, 577–581.
- [59] Lucey, C.A. (1985) Active Role of Oxygen and NADH Oxidase in Growth and Energy Metabolism of *Leuconostoc*. M.Sc. Thesis, University College, Cork, Ireland.
- [60] Thomas, T.D., Ellwood, D.C. and Longyear, M.V. (1979) Change from homo- to heterolactic fermentation by *Streptococcus lactis* resulting from glucose limitation in anaerobic chemostat cultures. J. Bacteriol. 138, 109–117.
- [61] Hansson, L. and Haggstrom, M.H. (1984) Effects of growth conditions on the activities of superoxide dismutase and NADH oxidase/NADH peroxidase in *Streptococcus lactis*. Curr. Microbiol. 10, 345–352.
- [62] Götz, F. and Schleifer, K.H. (1978) Biochemical properties and the physiological role of the fructose-1,6-bisphosphate activated L-lactate dehydrogenase from *Staphylococcus epidermidis*. Eur. J. Biochem. 90, 555–561.
- [63] Abbe, K., Takahashi, S. and Yamada, T. (1982) Involvement of oxygen-sensitive pyruvate formate-lyase in mixed acid fermentation by *Streptococcus mutans* under strictly anaerobic conditions. J. Bacteriol. 152, 175–182.
- [64] Yamada, T., Takahashi-Abbe, S. and Abbe, K. (1985) Effect of oxygen on pyruvate formate-lyase in situ and sugar metabolism of *Streptococcus mutans* and *Streptococcus sanguis*. Infect. Immun. 47, 129–134.
- [65] Van Beelan, P., Van der Hoeven, J.S., De Jong, M.H. and Hoogendorn, H. The effect of oxygen on the growth and acid production of *Streptococcus mutans* and *Streptococcus sanguis*. FEMS Microbiol. Ecol. 38, 25–30.
- [66] Lindmark, D.G., Paoletta, P. and Wood, W.P. (1969) The pyruvate formate-lyase system of *Streptococcus faecalis*, I. Purification and properties of the formate-pyruvate exchange enzyme. J. Biol. Chem. 244, 3605–3612.
- [67] Thomas, T.D., Turner, K.W. and Crow, V.L. (1980) Galactose fermentation by *Streptococcus lactis* and *Streptococcus cremoris*: Pathways, products and regulation. J. Bacteriol. 144, 672–682.
- [68] Takahashi, S., Abbe, K. and Yamada, T. (1982) Purification of pyruvate formate-lyase from *Streptococcus mutans* and its regulatory properties. J. Bacteriol. 149, 1034–1040.
- [69] Yamada, T. and Carlsson, J. (1976) The role of pyruvate formate-lyase in glucose metabolism of *Streptococcus mutans*. In: Proceedings of Microbial Aspects of Dental Caries, Vol. 3 (Stiles, H.M., Loesche, W.J. and O'Brien, T.C., Eds.), pp. 809–818. Information Retrieval Inc., Washington, DC.
- [70] Broome, M.C., Thomas, M.P., Hillier, A.J., Horwood, J.F. and Jago, G.R. (1979) The effect of linoleic acid on the growth and metabolism of *Streptococcus lactis*. Aust. J. Dairy Technol. 34, 163–168.
- [71] Broome, M.C., Thomas, M.P., Hillier, A.J. and Jago, G.R. (1980) Pyruvate dehydrogenase activity in Group N streptococci. Aust. J. Biol. Sci. 33, 15–25.
- [72] Brown, W.V. and Collins, E.B. (1977) End-products and fermentation balances for lactic streptococci grown aerobically on low concentrations of glucose. Appl. Environ. Microbiol. 33, 38–42.
- [73] Demko, G.M., Blanton, S.J.B. and Benoit, R.E. (1972) Heterofermentative carbohydrate metabolism of lactose-impaired mutants of *Streptococcus lactis*. J. Bacteriol. 112, 1335–1345.
- [74] Mickelson, M.N. (1967) Aerobic metabolism of *Streptococcus agalactiae*. J. Bacteriol. 94, 184–191.
- [75] Mickelson, M.N. (1972) Glucose degradation, molar growth yields and evidence for oxidative phosphorylation in *Streptococcus agalactiae*. J. Bacteriol. 109, 96–105.
- [76] Fordyce, A.M., Crow, V.L. and Thomas, T.D. (1984) Regulation of product formation during glucose or lactose limitation in non growing cells of *Streptococcus lactis*. Appl. Environ. Microbiol. 48, 332–337.
- [77] Dolin, M.I. and Gunsalus, I.C. (1951) Pyruvic acid metabolism, II. The acetoin-forming enzyme system in *Streptococcus faecalis*. J. Bacteriol. 62, 199–214.
- [78] Collins, E.B. and Speckman, R.A. (1974) Evidence for cellular control in the synthesis of acetoin or  $\alpha$ -ketoisovaleric acid by microorganisms. Can. J. Microbiol. 20, 805–811.
- [79] Cogan, J.F. (1986) Effects of Aeration on the End Products of Hexose Metabolism by *Streptococcus lactis* 712. M.Sc. Thesis, University College, Cork, Ireland.
- [80] Harvey, R.J. and Collins, E.B. (1961) Role of citratase in acetoin formation by *Streptococcus diacetylactis* and *Leuconostoc citrovorum*. J. Bacteriol. 82, 954–959.
- [81] Manderson, G.J. and Doelle, H.W. (1972) The effect of oxygen and pH on glucose metabolism of *Lactobacillus casei* var. *rhamnosus* ATCC 7469. Antonie van Leeuwenhoek 38, 223–240.
- [82] Drinan, D.F., Tobin, S. and Cogan, T.M. (1976) Citric acid metabolism in hetero- and homofermentative lactic acid bacteria. Appl. Environ. Microbiol. 31, 481–486.
- [83] Cogan, T.M., O'Dowd, M. and Mellerick, D. (1981) Effects of pH and sugar on acetoin production from citrate by *Leuconostoc lactis*. Appl. Environ. Microbiol. 41, 1–8.
- [84] Thomas, T.D. and Turner, K.W. (1981) Carbohydrate fermentation by *Streptococcus cremoris* and *Streptococcus lactis* growing in agar gels. Appl. Environ. Microbiol. 41, 1289–1294.
- [85] McKay, L.L. and Baldwin, K.A. (1974) Altered metabolism in a *Streptococcus lactis* C2 mutant deficient in lactic dehydrogenase. J. Dairy Sci. 57, 181–186.
- [86] Smalley, A.J., Jahrling, P. and Van Demark, P.J. (1968) Molar growth yields as evidence for oxidative phosphorylation in *Streptococcus faecalis* strain 10C1. J. Bacteriol. 96, 1595–1600.
- [87] Dirar, H. and Collins, E.B. (1973) Aerobic utilisation of

- low concentrations of galactose by *Lactobacillus plantarum*. J. Gen. Microbiol. 78, 211–215.
- [88] Seeley, H.W. and Van Demark, P.J. (1951) An adaptive peroxidation by *Streptococcus faecalis*. J. Bacteriol. 61, 27–35.
- [89] Murphy, M.G., O'Connor, L., Walsh, D. and Condon, S. (1985) Oxygen dependent lactate utilisation by *Lactobacillus plantarum*. Arch. Microbiol. 141, 75–79.
- [90] Christman, M.F., Morgan, R.W., Jacobson, F.S. and Ames, B.N. (1985) Positive control of a regulon for defenses against oxidative stress and some heat-shock proteins in *Salmonella typhimurium*. Cell 41, 753–762.
- [91] Demple, B. and Halbrook, J. (1983) Inducible repair of oxidative damage in *Escherichia coli*. Nature 304, 466–468.
